# Supplementary material
Source: PubMed Central journal article supplement (PMC2584717)
Supplement: 0804782105_0804782105SI.pdf [file 0804782105_0804782105SI.pdf]

# Supporting Information

Naderi et al. 10.1073/pnas.0804782105

## SI Methods

### Frequency of the A Haplogroup at the Time of the Domestication.

Assuming a neutral model of evolution, we computed the minimum frequency of the A haplogroup at the time domestication that is compatible with its current frequency. More precisely, we computed the probability of observing more individuals from the A haplogroup than the number of individuals actually sampled (2,208). This probability was computed for different values of the frequency  $x$  of A haplotypes at the time of the domestication. The smallest  $x$  value such that the probability was larger than 0.01 was considered to be the smallest number of haplotypes captured that is compatible with the observed number of A haplotypes sampled.

For a given value  $k$  of the number of individuals from the A haplogroup at the time of domestication and a given value  $m$  of the number of ancestral haplotypes, the proportion of the number of individuals from the A haplogroup at the present time can be approximated by a Beta distribution with parameters  $k$  and  $m-k$ . Therefore, the present number of individuals from the A haplogroup follows a Beta Binomial distribution (1) with parameters  $k$ ,  $m-k$  and  $n$  ( $n = 2,427$ ; the present number of individuals analyzed). The ancestral number of individuals from the A haplogroup  $k$  is unknown and has a binomial distribution with parameters  $m$  and  $x$ . As a consequence, the probability of getting more than 2,208 individuals from the A haplogroup today was given by the survival function of the Beta Binomial distribution integrated over the possible values for the number of ancestral A haplotypes. To infer the number  $m$  of ancestral lineages, we turned the phylogeny into an ultrametric tree using the software PATHD8 (2). Assuming 200 to 300 thousand years as the divergence time between A and C haplogroups (3), we found that the number of ancestral lineages, at the time of domestication, ranges from 1,308 to 1,900.

## Discussion

**Introgression from the Domesticated to the Wilds and Feralization in Southeastern Iran.** Present day samples analysis could be complicated if there were Neolithic feralization or mitochondrial DNA introgression from domestic to wild populations. It is therefore important to identify such events in our dataset. Currently, individuals from the A haplogroups represent 90.86% of domestic goats (4). This proportion cannot have changed dramatically since their domestication, and thus the A haplogroups were always the most numerous during goat history (see above, *Frequency of the A haplogroup at the time of the domestication*, and Fig. S1). As a consequence, potential feralizations and introgressions from the domestic to the wild should have affected the A haplogroup.

Furthermore, the introgressed haplotypes should be expected to appear in many clades of the phylogenetic tree of the A haplogroup, as would the A haplotypes of a present domestic goat population. A wild population without introgression, on the other hand, should only show a very limited number of clustered haplotypes.

As the A haplogroup is absent in bezoars from the Iranian Plateau and from the Zagros, we can deduce that no mtDNA introgression from the domestic to the wilds occurred in these areas. The situation is very different in Lar Mountains (Sistan Province, Southeast Iran, locality 33 in Fig. 3B). There, the bezoar haplotypes of the A haplogroups are distributed among many clades of the phylogeny of the A haplogroup (Fig. S2). This is a strong indication of early feralizations or that the bezoars from this region have been heavily introgressed by domestic goats. As a consequence, the Lar Mountains cannot be considered as a possible origin of the A haplogroup in goats. This introgression is also supported by a phylogeographic argument. The phylogenetic tree of the bezoar (see Fig. 1) is composed of three main groups: (i) haplogroups not-close-to-domestics and F, (ii) haplogroup C, and (iii) haplogroups A, B, D, and G. Individuals from haplogroups A, B, D, and G are clustered together in the phylogenetic tree, and thus are likely close in geographic origin. Clearly, the only individuals of the A haplogroup that are not consistent with their position in the phylogeny are in localities 33, 38, and 39. These introgressions occurred after the effective domestication and thus concerned the most frequent A haplogroup in domestic goats. This pattern may be a vestige of the original movement of goats into South Asia detected in the Mehrgahr faunal remains (20–22).

### Mitochondrial DNA Versus Nuclear DNA for Assessing the Domestication Process.

In this study we focused only on mitochondrial DNA for two reasons. First, we did not invest in analyzing autosomal markers for localizing the domestication centers because the genetic structure is usually stronger with mtDNA than with autosomal markers. In a situation where the phylogeographic structure is already weak with mtDNA, it is unlikely that the analysis of autosomal markers will exhibit a clear pattern that might improve our interpretation of goat domestication. Additionally, the level of polymorphism of the Y-chromosome is low in *C. hircus* and *C. aegagrus* (only four haplotypes found by sequencing the amelogenin and the *ZFY* genes; see ref. 5). As a consequence, it seems also unlikely that an extensive analysis of the Y-chromosome would give a clear pattern. Second, very few data on nuclear DNA are available in domestic goats, and the production of nuclear sequences in the wild ancestor would not allow the comparison between the domestic and the wild forms.

1. Johnson LN, Kotz S, Kemp AW (1992) *Univariate Discrete Distributions*, 2nd Edition (John Wiley & Sons, New York).
2. Britton T, Anderson C, Jacquet D, Lundquist S, Bremer K (2007) Estimating divergence times in large phylogenetic trees. *Syst Biol* 56:741–752.
3. Luikart G, et al. (2001) Multiple maternal origins and weak phylogeographic structure in domestic goats. *Proc Natl Acad Sci USA* 98:5927–5932.
4. Naderi S, et al. (2007) Large-scale mitochondrial DNA analysis of the domestic goat reveals six maternal lineages with high haplotype diversity. *PLoS ONE* 10:e1012.
5. Pidancier N, Jordan S, Luikart G, Taberlet P (2006) Evolutionary history of the genus *Capra* (Mammalia, Artiodactyla): Discordance between mitochondrial DNA and Y-chromosome phylogenies. *Mol Phylog Evol* 40:739–749.
6. Peters J, von den Driesch A, Helmer D (2005) in *The First Steps of Animal Domestication. New Archaeological Approaches*, eds Vigne JD, Peters J, Helmer D (Oxbow Books, Oxford, UK), pp 96–124.
7. Vigne, JD, et al. (2000) in *Archaeozoology of the Near East IV, Proceedings of the Fourth International Symposium Archaeozoology of Southwestern Asia and Adjacent Areas* (ASWA; Paris, June 1998), eds Mashkour M, Choyke AM, Buitenhuis H, Poplin F (Archaeological Research and Consultancy, Groningen), pp 52–75.
8. Vigne JD, Carrère I, Guilaine J (2003) in *Le Néolithique de Chypre*, eds Guilaine J, Le Brun A (Bull. Corr. Héliéniques, Vol. Suppl. 43), pp 239–251.
9. Helmer D, Gourichon L (2008) in *Archaeozoology of the Near East VIII, Proceedings of the Fourth International Symposium Archaeozoology of Southwestern Asia and Adjacent Areas*, eds Vila E, Gourichon L (Maison de l'Orient Méditerranéen, Lyon), in press.
10. Hongo H, Meadow R.H (2000) in *Archaeozoology of the Near East IV, Proceedings of the Fourth International Symposium Archaeozoology of Southwestern Asia and Adjacent Areas*, eds Mashkour M., Choyke AM, Buitenhuis H, Poplin F (Archaeological Research and Consultancy, Groningen), pp 121–140.
11. Vigne JD, Buitenhuis H (1999) Les premiers pas de la domestication animale à l'Ouest de l'Euphrate : Chypre et l'Anatolie centrale. *Paléorient* 25:49–62.
12. Koslowski SK (1989–1999) *Nemrik 9 – Pre Pottery Neolithic Site in Iraq* (Inst. Archaeol., Warsaw, vol 1–5).
13. Zeder MA, Hesse B (2000) The initial domestication of goats (*Capra hircus*) in the Zagros Mountains 10,000 years ago. *Science* 287:2254–2257.
14. Zeder MA (2001) A metrical analysis of a collection of modern goats (*Capra hircus aegagrus* and *C. h. hircus*) from Iran and Iraq: Implications for the study of caprine domestication. *J Archaeol Sci* 28:61–79.

15. Zeder MA (2005) in *The First Steps of Animal Domestication. New Archaeological Approaches*, eds Vigne JD, Peters J, Helmer D (Oxbow Books, Oxford, UK), pp 125–146.
16. Saña Seguí M (1999) *Arqueologia de la domesticació animal. La gestió de los recursos animals en Tell Halula (Valle del Éufrates-Síria) del 8.800 al 7.000 BP*. (Universitat Autònoma de Barcelona, Treballs d'Arqueologia del Pròxim Orient 1. Barcelona).
17. Legge AJ (1996) in *The Origins and Spread of Agriculture and Pastoralism in Eurasia*, ed Harris DR (Smithsonian Institution Press, Washington D.C.), pp 238–262.
18. Moore AMT, Legge AJ, Hillman GC (2000) *Village on the Euphrates* (Oxford Univ Press, Oxford USA).
19. Mashkour M (2006) in *The Origins of State Organizations in Prehistoric Highland Fars, Excavations at Tall-e Bakun*, ed Alizadeh A (Oriental Institut Publications 128, Chicago, Illinois), pp 101–105.
20. Meadow RH (1981) in *South Asian Archaeology 1979*, ed Härtel H (Dietrich Reimer Verlag, Berlin), pp 143–179.
21. Meadow RH (1984) in *Animals and Archaeology 3. Early Herders and their Flocks*, eds Clutton-Brock J, Grigson G (Harris DR (Oxford: British Archaeological Reports S202), pp 309–337).
22. Meadow RH (1996) in *The Origins and Spread of Agriculture and Pastoralism in Eurasia*, ed Harris DR (Smithsonian Institution Press, Washington D.C.), pp 390–412.

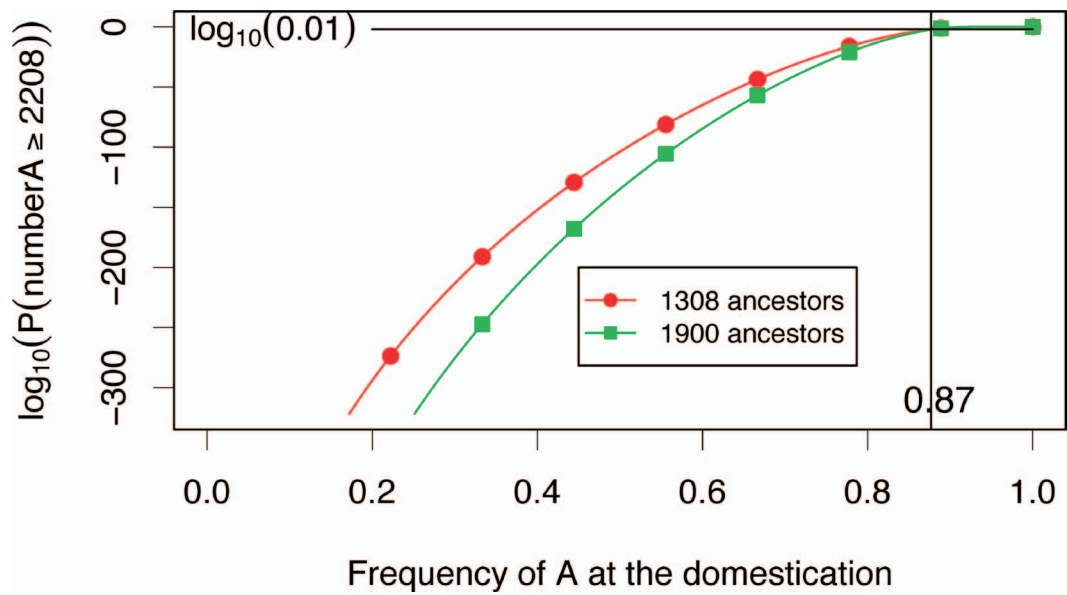

**Fig. S1.** Probability of observing more than the present number of individuals from the A haplogroup as a function of the frequency of the individuals from the A haplogroup at the time of the domestication. The number of ancestral  $m$ , at the time of domestication, was set to 1,308 and 1,900 (see [SI Text](#)). It is highly unlikely that the frequency of individuals from the A haplogroup at the time of domestication was below 0.87.

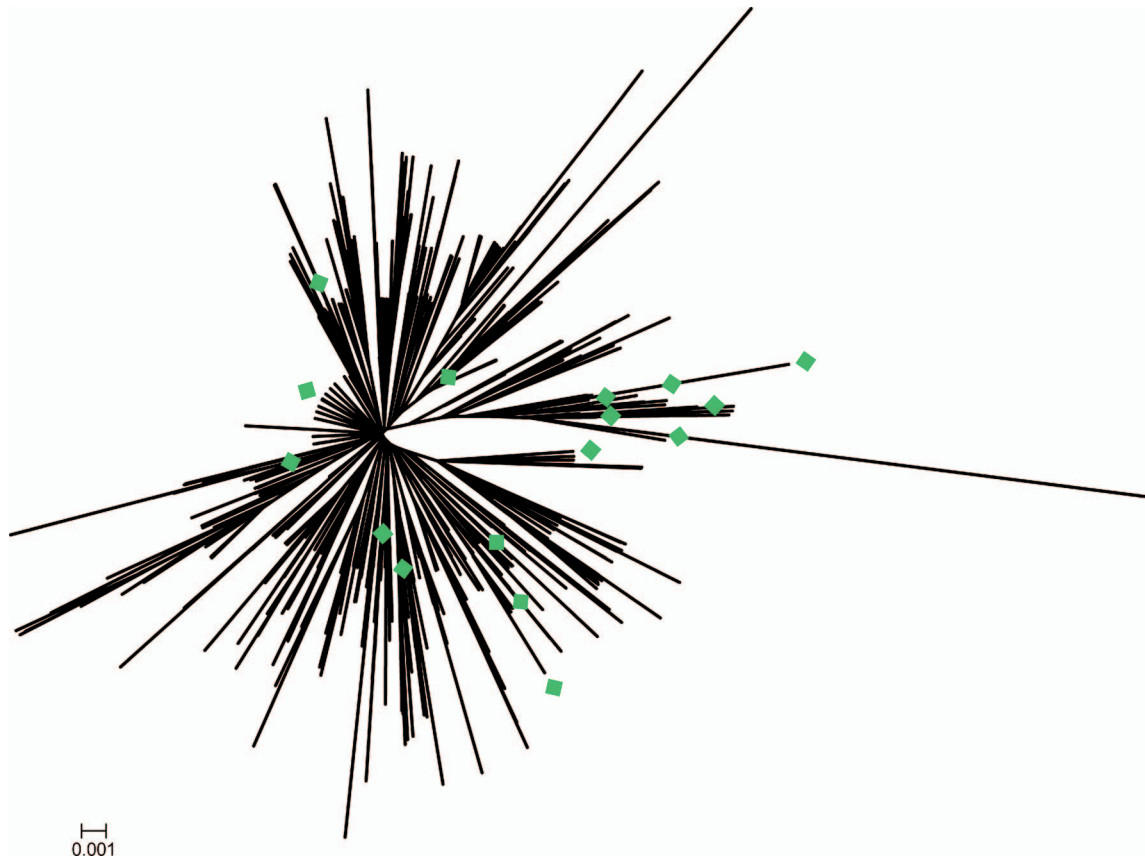

**Fig. S2.** Placement of the bezoars of the A haplogroup from the Lar Mountains (Southeast Iran, locality 33 in Fig. 3B) within the phylogeny of the A haplogroup of domestic goats. The presence of bezoar haplotypes (green) in many different clades of the phylogeny indicates a likely introgression from the domestics to the wilds.

**Table S1. Geographic origin and characteristics of the wild goat samples used for the mtDNA sequence analysis**

| Sample number | Code  | Haplotypes | Haplogroup | Species            | Country | Population       | Longitude (E) | Latitude (N) | Sample type | Collector        | Accession no. |
|---------------|-------|------------|------------|--------------------|---------|------------------|---------------|--------------|-------------|------------------|---------------|
| 1             | Ca001 | 1          | A          | <i>C. aegagrus</i> | Iran    | Lar, Sistan (33) | 60.88         | 29.68        | Feces       | S. Naderi        | EF989163      |
| 2             | Ca002 | 2          | A          | <i>C. aegagrus</i> | Iran    | Lar, Sistan (33) | 60.88         | 29.68        | Feces       | S. Naderi        | EF989164      |
| 3             | Ca003 | 17         | A          | <i>C. aegagrus</i> | Iran    | Lar, Sistan (33) | 60.88         | 29.68        | Feces       | S. Naderi        | EF989165      |
| 4             | Ca004 | 3          | A          | <i>C. aegagrus</i> | Iran    | Lar, Sistan (33) | 60.88         | 29.68        | Feces       | S. Naderi        | EF989166      |
| 5             | Ca005 | 4          | A          | <i>C. aegagrus</i> | Iran    | Lar, Sistan (33) | 60.88         | 29.68        | Feces       | S. Naderi        | EF989167      |
| 6             | Ca006 | 5          | A          | <i>C. aegagrus</i> | Iran    | Lar, Sistan (33) | 60.88         | 29.68        | Feces       | S. Naderi        | EF989168      |
| 7             | Ca007 | 6          | A          | <i>C. aegagrus</i> | Iran    | Lar, Sistan (33) | 60.88         | 29.68        | Feces       | S. Naderi        | EF989169      |
| 8             | Ca008 | 7          | A          | <i>C. aegagrus</i> | Iran    | Lar, Sistan (33) | 60.88         | 29.68        | Feces       | S. Naderi        | EF989170      |
| 9             | Ca009 | 8          | A          | <i>C. aegagrus</i> | Iran    | Lar, Sistan (33) | 60.88         | 29.68        | Feces       | S. Naderi        | EF989171      |
| 10            | Ca010 | 9          | A          | <i>C. aegagrus</i> | Iran    | Lar, Sistan (33) | 60.88         | 29.68        | Feces       | S. Naderi        | EF989172      |
| 11            | Ca011 | 10         | A          | <i>C. aegagrus</i> | Iran    | Lar, Sistan (33) | 60.88         | 29.68        | Feces       | S. Naderi        | EF989173      |
| 12            | Ca012 | 11         | A          | <i>C. aegagrus</i> | Iran    | Lar, Sistan (33) | 60.88         | 29.68        | Feces       | S. Naderi        | EF989174      |
| 13            | Ca013 | 12         | A          | <i>C. aegagrus</i> | Iran    | Lar, Sistan (33) | 60.88         | 29.68        | Feces       | S. Naderi        | EF989175      |
| 14            | Ca014 | 11         | A          | <i>C. aegagrus</i> | Iran    | Lar, Sistan (33) | 60.88         | 29.68        | Feces       | S. Naderi        | EF989176      |
| 15            | Ca015 | 13         | A          | <i>C. aegagrus</i> | Iran    | Lar, Sistan (33) | 60.88         | 29.68        | Feces       | S. Naderi        | EF989177      |
| 16            | Ca016 | 14         | A          | <i>C. aegagrus</i> | Iran    | Lar, Sistan (33) | 60.88         | 29.68        | Tissue      | S. Naderi        | EF989178      |
| 17            | Ca017 | 15         | A          | <i>C. aegagrus</i> | Iran    | Lar, Sistan (33) | 60.88         | 29.68        | Tissue      | S. Naderi        | EF989179      |
| 18            | Ca018 | 16         | A          | <i>C. aegagrus</i> | Iran    | Lar, Sistan (33) | 60.88         | 29.68        | Feces       | S. Naderi        | EF989180      |
| 19            | Ca019 | 17         | A          | <i>C. aegagrus</i> | Iran    | Salook (38)      | 57.26         | 37.22        | Feces       | S. Naderi        | EF989181      |
| 20            | Ca020 | 18         | A          | <i>C. aegagrus</i> | Iran    | Tandooreh (39)   | 58.87         | 37.41        | Tissue      | S. Naderi        | EF989182      |
| 21            | Ca021 | 19         | A          | <i>C. aegagrus</i> | Turkey  | Artvin (9)       | 41.49         | 41.11        | Tissue      | A. Kence         | EF989183      |
| 22            | Ca022 | 15         | A          | <i>C. aegagrus</i> | Turkey  | Tunceli (8)      | 39.34         | 39.07        | Tissue      | A. Kence         | EF989184      |
| 23            | Ca023 | 15         | A          | <i>C. aegagrus</i> | Turkey  | Tunceli (8)      | 39.34         | 39.07        | Tissue      | A. Kence         | EF989185      |
| 24            | Ca024 | 15         | A          | <i>C. aegagrus</i> | Turkey  | Tunceli (8)      | 39.34         | 39.07        | Tissue      | A. Kence         | EF989186      |
| 25            | Ca025 | 20         | A          | <i>C. aegagrus</i> | Turkey  | Tunceli (8)      | 39.34         | 39.07        | Bone        | A. Kence         | EF989187      |
| 26            | Ca026 | 21         | A          | <i>C. aegagrus</i> | Turkey  | Tunceli (8)      | 39.34         | 39.07        | Bone        | A. Kence         | EF989188      |
| 27            | Ca027 | 22         | A          | <i>C. aegagrus</i> | Turkey  | Gaziantep (7)    | 37.72         | 38.45        | Liver       | A. Kence         | EF989189      |
| 28            | Ca028 | 23         | A          | <i>C. aegagrus</i> | Turkey  | Sumbul (11)      | 43.78         | 37.53        | Tissue      | A. Kence         | EF989190      |
| 29            | Ca029 | 24         | A          | <i>C. aegagrus</i> | Turkey  | Gaziantep (7)    | 37.72         | 38.45        | Tissue      | A. Kence         | EF989191      |
| 30            | Ca030 | 25         | B          | <i>C. aegagrus</i> | Iran    | Marakan (12)     | 45.24         | 38.85        | Feces       | H.-R. Rezaei     | EF989192      |
| 31            | Ca031 | 26         | B          | <i>C. aegagrus</i> | Iran    | Ghorveh (18)     | 47.82         | 35.06        | Feces       | H.-R. Rezaei     | EF989193      |
| 32            | Ca032 | 27         | B          | <i>C. aegagrus</i> | Iran    | Ghorveh (18)     | 47.82         | 35.06        | Feces       | H.-R. HR. Rezaei | EF989194      |
| 33            | Ca033 | 26         | B          | <i>C. aegagrus</i> | Iran    | Ghorveh (18)     | 47.82         | 35.06        | Feces       | H.-R. HR. Rezaei | EF989195      |
| 34            | Ca034 | 28         | B          | <i>C. aegagrus</i> | Iran    | Ghorveh (18)     | 47.82         | 35.06        | Feces       | H.-R. HR. Rezaei | EF989196      |
| 35            | Ca035 | 29         | B          | <i>C. aegagrus</i> | Iran    | Ghazvin (20)     | 49.57         | 36.09        | Tissue      | H.-R. HR. Rezaei | EF989197      |
| 36            | Ca036 | 30         | B          | <i>C. aegagrus</i> | Iran    | Ghazvin (20)     | 49.57         | 36.09        | Tissue      | H.-R. HR. Rezaei | EF989198      |
| 37            | Ca037 | 31         | B          | <i>C. aegagrus</i> | Iran    | Ghazvin (20)     | 49.57         | 36.09        | Tissue      | H.-R. HR. Rezaei | EF989199      |
| 38            | Ca038 | 32         | B          | <i>C. aegagrus</i> | Turkey  | Van (10)         | 43.22         | 38.29        | Tissue      | A. Kence         | EF989200      |
| 39            | Ca039 | 33         | B          | <i>C. aegagrus</i> | Turkey  | Antalya (2)      | 30.95         | 36.9         | Feces       | A. Kence         | EF989201      |
| 40            | Ca040 | 34         | C          | <i>C. aegagrus</i> | Iran    | Kolahghazi (23)  | 51.81         | 32.42        | Feces       | S. Naderi        | EF989202      |
| 41            | Ca041 | 34         | C          | <i>C. aegagrus</i> | Iran    | Kolahghazi (23)  | 51.81         | 32.42        | Feces       | S. Naderi        | EF989203      |
| 42            | Ca042 | 34         | C          | <i>C. aegagrus</i> | Iran    | Kolahghazi (23)  | 51.81         | 32.42        | Feces       | S. Naderi        | EF989204      |
| 43            | Ca043 | 34         | C          | <i>C. aegagrus</i> | Iran    | Kolahghazi (23)  | 51.81         | 32.42        | Feces       | S. Naderi        | EF989205      |
| 44            | Ca044 | 34         | C          | <i>C. aegagrus</i> | Iran    | Kolahghazi (23)  | 51.81         | 32.42        | Feces       | S. Naderi        | EF989206      |
| 45            | Ca045 | 34         | C          | <i>C. aegagrus</i> | Iran    | Kolahghazi (23)  | 51.81         | 32.42        | Feces       | S. Naderi        | EF989207      |
| 46            | Ca046 | 35         | C          | <i>C. aegagrus</i> | Iran    | Kolahghazi (23)  | 51.81         | 32.42        | Feces       | S. Naderi        | EF989208      |
| 47            | Ca047 | 36         | C          | <i>C. aegagrus</i> | Iran    | Kolahghazi (23)  | 51.81         | 32.42        | Feces       | S. Naderi        | EF989209      |
| 48            | Ca048 | 36         | C          | <i>C. aegagrus</i> | Iran    | Kolahghazi (23)  | 51.81         | 32.42        | Feces       | S. Naderi        | EF989210      |
| 49            | Ca049 | 36         | C          | <i>C. aegagrus</i> | Iran    | Kolahghazi (23)  | 51.81         | 32.42        | Feces       | S. Naderi        | EF989211      |
| 50            | Ca050 | 36         | C          | <i>C. aegagrus</i> | Iran    | Kolahghazi (23)  | 51.81         | 32.42        | Feces       | S. Naderi        | EF989212      |
| 51            | Ca051 | 55         | C          | <i>C. aegagrus</i> | Iran    | Bavanat (25)     | 53.91         | 30.31        | Feces       | S. Naderi        | EF989213      |
| 52            | Ca052 | 37         | C          | <i>C. aegagrus</i> | Iran    | Bavanat (25)     | 53.91         | 30.31        | Tissue      | S. Naderi        | EF989214      |
| 53            | Ca053 | 37         | C          | <i>C. aegagrus</i> | Iran    | Khabr (31)       | 56.48         | 28.84        | Feces       | S. Naderi        | EF989215      |
| 54            | Ca054 | 37         | C          | <i>C. aegagrus</i> | Iran    | Khabr (31)       | 56.48         | 28.84        | Feces       | S. Naderi        | EF989216      |
| 55            | Ca055 | 37         | C          | <i>C. aegagrus</i> | Iran    | Bavanat (25)     | 53.91         | 30.31        | Feces       | S. Naderi        | EF989217      |
| 56            | Ca056 | 37         | C          | <i>C. aegagrus</i> | Iran    | Bavanat (25)     | 53.91         | 30.31        | Feces       | S. Naderi        | EF989218      |
| 57            | Ca057 | 37         | C          | <i>C. aegagrus</i> | Iran    | Bavanat (25)     | 53.91         | 30.31        | Feces       | S. Naderi        | EF989219      |
| 58            | Ca058 | 37         | C          | <i>C. aegagrus</i> | Iran    | Bavanat (25)     | 53.91         | 30.31        | Feces       | S. Naderi        | EF989220      |
| 59            | Ca059 | 37         | C          | <i>C. aegagrus</i> | Iran    | Bavanat (25)     | 53.91         | 30.31        | Feces       | S. Naderi        | EF989221      |
| 60            | Ca060 | 37         | C          | <i>C. aegagrus</i> | Iran    | Bavanat (25)     | 53.91         | 30.31        | Feces       | S. Naderi        | EF989222      |
| 61            | Ca061 | 37         | C          | <i>C. aegagrus</i> | Iran    | Bavanat (25)     | 53.91         | 30.31        | Feces       | S. Naderi        | EF989223      |
| 62            | Ca062 | 37         | C          | <i>C. aegagrus</i> | Iran    | Bavanat (25)     | 53.91         | 30.31        | Feces       | S. Naderi        | EF989224      |
| 63            | Ca063 | 37         | C          | <i>C. aegagrus</i> | Iran    | Bavanat (25)     | 53.91         | 30.31        | Feces       | S. Naderi        | EF989225      |

| Sample number | Code  | Haplotypes | Haplogroup | Species            | Country | Population       | Longitude (E) | Latitude (N) | Sample type | Collector        | Accession no. |
|---------------|-------|------------|------------|--------------------|---------|------------------|---------------|--------------|-------------|------------------|---------------|
| 64            | Ca064 | 37         | C          | <i>C. aegagrus</i> | Iran    | Bavanat (25)     | 53.91         | 30.31        | Feces       | S. Naderi        | EF989226      |
| 65            | Ca065 | 38         | C          | <i>C. aegagrus</i> | Iran    | Bavanat (25)     | 53.91         | 30.31        | Feces       | S. Naderi        | EF989227      |
| 66            | Ca066 | 39         | C          | <i>C. aegagrus</i> | Iran    | Bavanat (25)     | 53.91         | 30.31        | Feces       | S. Naderi        | EF989228      |
| 67            | Ca067 | 40         | C          | <i>C. aegagrus</i> | Iran    | Bavanat (25)     | 53.91         | 30.31        | Feces       | S. Naderi        | EF989229      |
| 68            | Ca068 | 41         | C          | <i>C. aegagrus</i> | Iran    | Khabr (31)       | 56.48         | 28.84        | Feces       | S. Naderi        | EF989230      |
| 69            | Ca069 | 41         | C          | <i>C. aegagrus</i> | Iran    | Khabr (31)       | 56.48         | 28.84        | Feces       | S. Naderi        | EF989231      |
| 70            | Ca070 | 41         | C          | <i>C. aegagrus</i> | Iran    | Khabr (31)       | 56.48         | 28.84        | Feces       | S. Naderi        | EF989232      |
| 71            | Ca071 | 41         | C          | <i>C. aegagrus</i> | Iran    | Khabr (31)       | 56.48         | 28.84        | Feces       | S. Naderi        | EF989233      |
| 72            | Ca072 | 41         | C          | <i>C. aegagrus</i> | Iran    | Khabr (31)       | 56.48         | 28.84        | Feces       | S. Naderi        | EF989234      |
| 73            | Ca073 | 41         | C          | <i>C. aegagrus</i> | Iran    | Khabr (31)       | 56.48         | 28.84        | Feces       | S. Naderi        | EF989235      |
| 74            | Ca074 | 41         | C          | <i>C. aegagrus</i> | Iran    | Khabr (31)       | 56.48         | 28.84        | Feces       | S. Naderi        | EF989236      |
| 75            | Ca075 | 41         | C          | <i>C. aegagrus</i> | Iran    | Khabr (31)       | 56.48         | 28.84        | Feces       | S. Naderi        | EF989237      |
| 76            | Ca076 | 41         | C          | <i>C. aegagrus</i> | Iran    | Khabr (31)       | 56.48         | 28.84        | Feces       | S. Naderi        | EF989238      |
| 77            | Ca077 | 42         | C          | <i>C. aegagrus</i> | Iran    | Khabr (31)       | 56.48         | 28.84        | Feces       | S. Naderi        | EF989239      |
| 78            | Ca078 | 41         | C          | <i>C. aegagrus</i> | Iran    | Khabr (31)       | 56.48         | 28.84        | Feces       | S. Naderi        | EF989240      |
| 79            | Ca079 | 41         | C          | <i>C. aegagrus</i> | Iran    | Khabr (31)       | 56.48         | 28.84        | Feces       | S. Naderi        | EF989241      |
| 80            | Ca080 | 41         | C          | <i>C. aegagrus</i> | Iran    | Khabr (31)       | 56.48         | 28.84        | Tissue      | S. Naderi        | EF989242      |
| 81            | Ca081 | 43         | C          | <i>C. aegagrus</i> | Iran    | Khabr (31)       | 56.48         | 28.84        | Feces       | S. Naderi        | EF989243      |
| 82            | Ca082 | 44         | C          | <i>C. aegagrus</i> | Iran    | Malayer (19)     | 48.95         | 34.21        | Feces       | HR. Rezaei       | EF989244      |
| 83            | Ca083 | 45         | C          | <i>C. aegagrus</i> | Iran    | Godghool (27)    | 55.14         | 29.45        | Feces       | S. Naderi        | EF989245      |
| 84            | Ca084 | 45         | C          | <i>C. aegagrus</i> | Iran    | Godghool (27)    | 55.14         | 29.45        | Feces       | S. Naderi        | EF989246      |
| 85            | Ca085 | 45         | C          | <i>C. aegagrus</i> | Iran    | Godghool (27)    | 55.14         | 29.45        | Feces       | S. Naderi        | EF989247      |
| 86            | Ca086 | 45         | C          | <i>C. aegagrus</i> | Iran    | Godghool (27)    | 55.14         | 29.45        | Feces       | S. Naderi        | EF989248      |
| 87            | Ca087 | 45         | C          | <i>C. aegagrus</i> | Iran    | Godghool (27)    | 55.14         | 29.45        | Feces       | S. Naderi        | EF989249      |
| 88            | Ca088 | 46         | C          | <i>C. aegagrus</i> | Iran    | Godghool (27)    | 55.14         | 29.45        | Feces       | S. Naderi        | EF989250      |
| 89            | Ca089 | 46         | C          | <i>C. aegagrus</i> | Iran    | Godghool (27)    | 55.14         | 29.45        | Feces       | S. Naderi        | EF989251      |
| 90            | Ca090 | 46         | C          | <i>C. aegagrus</i> | Iran    | Godghool (27)    | 55.14         | 29.45        | Feces       | S. Naderi        | EF989252      |
| 91            | Ca091 | 46         | C          | <i>C. aegagrus</i> | Iran    | Godghool (27)    | 55.14         | 29.45        | Feces       | S. Naderi        | EF989253      |
| 92            | Ca092 | 47         | C          | <i>C. aegagrus</i> | Iran    | Godghool (27)    | 55.14         | 29.45        | Feces       | S. Naderi        | EF989254      |
| 93            | Ca093 | 48         | C          | <i>C. aegagrus</i> | Iran    | Godghool (27)    | 55.14         | 29.45        | Feces       | S. Naderi        | EF989255      |
| 94            | Ca094 | 48         | C          | <i>C. aegagrus</i> | Iran    | Godghool (27)    | 55.14         | 29.45        | Feces       | S. Naderi        | EF989256      |
| 95            | Ca095 | 48         | C          | <i>C. aegagrus</i> | Iran    | Godghool (27)    | 55.14         | 29.45        | Feces       | S. Naderi        | EF989257      |
| 96            | Ca096 | 49         | C          | <i>C. aegagrus</i> | Iran    | Godghool (27)    | 55.14         | 29.45        | Feces       | S. Naderi        | EF989258      |
| 97            | Ca097 | 50         | C          | <i>C. aegagrus</i> | Iran    | Godghool (27)    | 55.14         | 29.45        | Feces       | S. Naderi        | EF989259      |
| 98            | Ca098 | 51         | C          | <i>C. aegagrus</i> | Iran    | Godghool (27)    | 55.14         | 29.45        | Feces       | S. Naderi        | EF989260      |
| 99            | Ca099 | 52         | C          | <i>C. aegagrus</i> | Iran    | Khartooran (36)  | 55.86         | 35.77        | Feces       | S. Naderi        | EF989261      |
| 100           | Ca100 | 66         | C          | <i>C. aegagrus</i> | Iran    | Khartooran (36)  | 55.86         | 35.77        | Feces       | S. Naderi        | EF989262      |
| 101           | Ca101 | 67         | C          | <i>C. aegagrus</i> | Iran    | Khartooran (36)  | 55.86         | 35.77        | Tissue      | S. Naderi        | EF989263      |
| 102           | Ca102 | 53         | C          | <i>C. aegagrus</i> | Iran    | Dahaj (29)       | 54.87         | 30.57        | Feces       | S. Naderi        | EF989264      |
| 103           | Ca103 | 53         | C          | <i>C. aegagrus</i> | Iran    | Dahaj (29)       | 54.87         | 30.57        | Feces       | S. Naderi        | EF989265      |
| 104           | Ca104 | 53         | C          | <i>C. aegagrus</i> | Iran    | Dahaj (29)       | 54.87         | 30.57        | Feces       | S. Naderi        | EF989266      |
| 105           | Ca105 | 53         | C          | <i>C. aegagrus</i> | Iran    | Dahaj (29)       | 54.87         | 30.57        | Feces       | S. Naderi        | EF989267      |
| 106           | Ca106 | 53         | C          | <i>C. aegagrus</i> | Iran    | Dahaj (29)       | 54.87         | 30.57        | Feces       | S. Naderi        | EF989268      |
| 107           | Ca107 | 53         | C          | <i>C. aegagrus</i> | Iran    | Dahaj (29)       | 54.87         | 30.57        | Feces       | S. Naderi        | EF989269      |
| 108           | Ca108 | 54         | C          | <i>C. aegagrus</i> | Iran    | Lar, Sistan (33) | 60.88         | 29.68        | Tissue      | S. Naderi        | EF989270      |
| 109           | Ca109 | 55         | C          | <i>C. aegagrus</i> | Iran    | Kalmand (28)     | 54.79         | 31.28        | Feces       | S. Naderi        | EF989271      |
| 110           | Ca110 | 54         | C          | <i>C. aegagrus</i> | Iran    | Kalmand (28)     | 54.79         | 31.28        | Feces       | S. Naderi        | EF989272      |
| 111           | Ca111 | 54         | C          | <i>C. aegagrus</i> | Iran    | Kalmand (28)     | 54.79         | 31.28        | Tissue      | S. Naderi        | EF989273      |
| 112           | Ca112 | 56         | C          | <i>C. aegagrus</i> | Iran    | Kalmand (28)     | 54.79         | 31.28        | Feces       | S. Naderi        | EF989274      |
| 113           | Ca113 | 57         | C          | <i>C. aegagrus</i> | Iran    | Kalmand (28)     | 54.79         | 31.28        | Feces       | S. Naderi        | EF989275      |
| 114           | Ca114 | 57         | C          | <i>C. aegagrus</i> | Iran    | Kalmand (28)     | 54.79         | 31.28        | Feces       | S. Naderi        | EF989276      |
| 115           | Ca115 | 54         | C          | <i>C. aegagrus</i> | Iran    | Kalmand (28)     | 54.79         | 31.28        | Feces       | S. Naderi        | EF989277      |
| 116           | Ca116 | 57         | C          | <i>C. aegagrus</i> | Iran    | Kalmand (28)     | 54.79         | 31.28        | Feces       | S. Naderi        | EF989278      |
| 117           | Ca117 | 57         | C          | <i>C. aegagrus</i> | Iran    | Kalmand (28)     | 54.79         | 31.28        | Feces       | S. Naderi        | EF989279      |
| 118           | Ca118 | 57         | C          | <i>C. aegagrus</i> | Iran    | Kalmand (28)     | 54.79         | 31.28        | Feces       | S. Naderi        | EF989280      |
| 119           | Ca119 | 57         | C          | <i>C. aegagrus</i> | Iran    | Kalmand (28)     | 54.79         | 31.28        | Feces       | S. Naderi        | EF989281      |
| 120           | Ca120 | 58         | C          | <i>C. aegagrus</i> | Iran    | Kalmand (28)     | 54.79         | 31.28        | Feces       | S. Naderi        | EF989282      |
| 121           | Ca121 | 59         | C          | <i>C. aegagrus</i> | Iran    | Kalmand (28)     | 54.79         | 31.28        | Feces       | S. Naderi        | EF989283      |
| 122           | Ca122 | 59         | C          | <i>C. aegagrus</i> | Iran    | Kalmand (28)     | 54.79         | 31.28        | Feces       | S. Naderi        | EF989284      |
| 123           | Ca123 | 59         | C          | <i>C. aegagrus</i> | Iran    | Kalmand (28)     | 54.79         | 31.28        | Feces       | S. Naderi        | EF989285      |
| 124           | Ca124 | 60         | C          | <i>C. aegagrus</i> | Iran    | Kalmand (28)     | 54.79         | 31.28        | Feces       | S. Naderi        | EF989286      |
| 125           | Ca125 | 41         | C          | <i>C. aegagrus</i> | Iran    | Ghorveh (18)     | 47.82         | 35.06        | Feces       | H.-R. HR. Rezaei | EF989287      |
| 126           | Ca126 | 61         | C          | <i>C. aegagrus</i> | Iran    | Bamoo (26)       | 52.68         | 29.69        | Feces       | S. Naderi        | EF989288      |
| 127           | Ca127 | 62         | C          | <i>C. aegagrus</i> | Iran    | Bamoo (26)       | 52.68         | 29.69        | Feces       | S. Naderi        | EF989289      |

| Sample number | Code  | Haplotypes | Haplogroup | Species                         | Country  | Population        | Longitude (E) | Latitude (N) | Sample type | Collector        | Accession no. |
|---------------|-------|------------|------------|---------------------------------|----------|-------------------|---------------|--------------|-------------|------------------|---------------|
| 128           | Ca128 | 64         | C          | <i>C. aegagrus</i>              | Iran     | Golestan (37)     | 56.14         | 37.43        | Feces       | H.-R. HR. Rezaei | EF989290      |
| 129           | Ca129 | 64         | C          | <i>C. aegagrus</i>              | Iran     | Golestan (37)     | 56.14         | 37.43        | Feces       | H.-R. HR. Rezaei | EF989291      |
| 130           | Ca130 | 63         | C          | <i>C. aegagrus</i>              | Iran     | Golestan (37)     | 56.14         | 37.43        | Feces       | H.-R. HR. Rezaei | EF989292      |
| 131           | Ca131 | 64         | C          | <i>C. aegagrus</i>              | Iran     | Golestan (37)     | 56.14         | 37.43        | Feces       | H.-R. HR. Rezaei | EF989293      |
| 132           | Ca132 | 64         | C          | <i>C. aegagrus</i>              | Iran     | Golestan (37)     | 56.14         | 37.43        | Feces       | H.-R. HR. Rezaei | EF989294      |
| 133           | Ca133 | 64         | C          | <i>C. aegagrus</i>              | Iran     | Golestan (37)     | 56.14         | 37.43        | Feces       | H.-R. HR. Rezaei | EF989295      |
| 134           | Ca134 | 65         | C          | <i>C. aegagrus</i>              | Iran     | Golestan (37)     | 56.14         | 37.43        | Feces       | H.-R. HR. Rezaei | EF989296      |
| 135           | Ca135 | 64         | C          | <i>C. aegagrus</i>              | Iran     | Golestan (37)     | 56.14         | 37.43        | Feces       | H.-R. HR. Rezaei | EF989297      |
| 136           | Ca136 | 64         | C          | <i>C. aegagrus</i>              | Iran     | Golestan (37)     | 56.14         | 37.43        | Feces       | H.-R. HR. Rezaei | EF989298      |
| 137           | Ca137 | 64         | C          | <i>C. aegagrus</i>              | Iran     | Golestan (37)     | 56.14         | 37.43        | Feces       | H.-R. HR. Rezaei | EF989299      |
| 138           | Ca138 | 64         | C          | <i>C. aegagrus</i>              | Iran     | Golestan (37)     | 56.14         | 37.43        | Feces       | H.-R. HR. Rezaei | EF989300      |
| 139           | Ca139 | 64         | C          | <i>C. aegagrus</i>              | Iran     | Golestan (37)     | 56.14         | 37.43        | Feces       | H.-R. HR. Rezaei | EF989301      |
| 140           | Ca140 | 66         | C          | <i>C. aegagrus</i>              | Iran     | Bafgh (30)        | 56.76         | 31.56        | Feces       | S. Naderi        | EF989302      |
| 141           | Ca141 | 66         | C          | <i>C. aegagrus</i>              | Iran     | Bafgh (30)        | 56.76         | 31.56        | Feces       | S. Naderi        | EF989303      |
| 142           | Ca142 | 57         | C          | <i>C. aegagrus</i>              | Iran     | Bafgh (30)        | 56.76         | 31.56        | Feces       | S. Naderi        | EF989304      |
| 143           | Ca143 | 66         | C          | <i>C. aegagrus</i>              | Iran     | Bafgh (30)        | 56.76         | 31.56        | Feces       | S. Naderi        | EF989305      |
| 144           | Ca144 | 66         | C          | <i>C. aegagrus</i>              | Iran     | Bafgh (30)        | 56.76         | 31.56        | Feces       | S. Naderi        | EF989306      |
| 145           | Ca145 | 66         | C          | <i>C. aegagrus</i>              | Iran     | Bafgh (30)        | 56.76         | 31.56        | Feces       | S. Naderi        | EF989307      |
| 146           | Ca146 | 66         | C          | <i>C. aegagrus</i>              | Iran     | Bafgh (30)        | 56.76         | 31.56        | Feces       | S. Naderi        | EF989308      |
| 147           | Ca147 | 66         | C          | <i>C. aegagrus</i>              | Iran     | Bafgh (30)        | 56.76         | 31.56        | Feces       | S. Naderi        | EF989309      |
| 148           | Ca148 | 66         | C          | <i>C. aegagrus</i>              | Iran     | Bafgh (30)        | 56.76         | 31.56        | Feces       | S. Naderi        | EF989310      |
| 149           | Ca149 | 66         | C          | <i>C. aegagrus</i>              | Iran     | Bafgh (30)        | 56.76         | 31.56        | Feces       | S. Naderi        | EF989311      |
| 150           | Ca150 | 66         | C          | <i>C. aegagrus</i>              | Iran     | Bafgh (30)        | 56.76         | 31.56        | Feces       | S. Naderi        | EF989312      |
| 151           | Ca151 | 66         | C          | <i>C. aegagrus</i>              | Iran     | Bafgh (30)        | 56.76         | 31.56        | Feces       | S. Naderi        | EF989313      |
| 152           | Ca152 | 66         | C          | <i>C. aegagrus</i>              | Iran     | Bafgh (30)        | 56.76         | 31.56        | Feces       | S. Naderi        | EF989314      |
| 153           | Ca153 | 66         | C          | <i>C. aegagrus</i>              | Iran     | Bafgh (30)        | 56.76         | 31.56        | Feces       | S. Naderi        | EF989315      |
| 154           | Ca154 | 66         | C          | <i>C. aegagrus</i>              | Iran     | Bafgh (30)        | 56.76         | 31.56        | Feces       | S. Naderi        | EF989316      |
| 155           | Ca155 | 64         | C          | <i>C. aegagrus</i>              | Iran     | Khoshyeylagh (35) | 55.43         | 36.71        | Feces       | S. Naderi        | EF989317      |
| 156           | Ca156 | 64         | C          | <i>C. aegagrus</i>              | Iran     | Khoshyeylagh (35) | 55.43         | 36.71        | Feces       | S. Naderi        | EF989318      |
| 157           | Ca157 | 64         | C          | <i>C. aegagrus</i>              | Iran     | Khoshyeylagh (35) | 55.43         | 36.71        | Feces       | S. Naderi        | EF989319      |
| 158           | Ca158 | 64         | C          | <i>C. aegagrus</i>              | Iran     | Khoshyeylagh (35) | 55.43         | 36.71        | Feces       | S. Naderi        | EF989320      |
| 159           | Ca159 | 64         | C          | <i>C. aegagrus</i>              | Iran     | Khoshyeylagh (35) | 55.43         | 36.71        | Feces       | S. Naderi        | EF989321      |
| 160           | Ca160 | 64         | C          | <i>C. aegagrus</i>              | Iran     | Khoshyeylagh (35) | 55.43         | 36.71        | Feces       | S. Naderi        | EF989322      |
| 161           | Ca161 | 64         | C          | <i>C. aegagrus</i>              | Iran     | Khoshyeylagh (35) | 55.43         | 36.71        | Feces       | S. Naderi        | EF989323      |
| 162           | Ca162 | 64         | C          | <i>C. aegagrus</i>              | Iran     | Khoshyeylagh (35) | 55.43         | 36.71        | Feces       | S. Naderi        | EF989324      |
| 163           | Ca163 | 64         | C          | <i>C. aegagrus</i>              | Iran     | Khoshyeylagh (35) | 55.43         | 36.71        | Feces       | S. Naderi        | EF989325      |
| 164           | Ca164 | 64         | C          | <i>C. aegagrus</i>              | Iran     | Khoshyeylagh (35) | 55.43         | 36.71        | Feces       | S. Naderi        | EF989326      |
| 165           | Ca165 | 64         | C          | <i>C. aegagrus</i>              | Iran     | Khoshyeylagh (35) | 55.43         | 36.71        | Feces       | S. Naderi        | EF989327      |
| 166           | Ca166 | 64         | C          | <i>C. aegagrus</i>              | Iran     | Khoshyeylagh (35) | 55.43         | 36.71        | Feces       | S. Naderi        | EF989328      |
| 167           | Ca167 | 64         | C          | <i>C. aegagrus</i>              | Iran     | Khoshyeylagh (35) | 55.43         | 36.71        | Feces       | S. Naderi        | EF989329      |
| 168           | Ca168 | 64         | C          | <i>C. aegagrus</i>              | Iran     | Khoshyeylagh (35) | 55.43         | 36.71        | Feces       | S. Naderi        | EF989330      |
| 169           | Ca169 | 64         | C          | <i>C. aegagrus</i>              | Iran     | Khoshyeylagh (35) | 55.43         | 36.71        | Feces       | S. Naderi        | EF989331      |
| 170           | Ca170 | 64         | C          | <i>C. aegagrus</i>              | Iran     | Khoshyeylagh (35) | 55.43         | 36.71        | Feces       | S. Naderi        | EF989332      |
| 171           | Ca171 | 64         | C          | <i>C. aegagrus</i>              | Iran     | Khojir (21)       | 51.72         | 35.63        | Feces       | S. Naderi        | EF989333      |
| 172           | Ca172 | 67         | C          | <i>C. aegagrus</i>              | Iran     | Tandooreh (39)    | 58.87         | 37.41        | Tissue      | S. Naderi        | EF989334      |
| 173           | Ca173 | 55         | C          | <i>C. aegagrus</i>              | Iran     | Dena (24)         | 51.32         | 31.06        | Feces       | S. Naderi        | EF989335      |
| 174           | Ca174 | 68         | C          | <i>C. aegagrus</i>              | Iran     | Mahneshan (17)    | 47.67         | 36.66        | Feces       | H.-R. HR. Rezaei | EF989336      |
| 175           | Ca175 | 69         | C          | <i>C. aegagrus</i>              | Iran     | Kavir (22)        | 52.19         | 34.71        | Feces       | S. Naderi        | EF989337      |
| 176           | Ca176 | 70         | C          | <i>C. aegagrus</i>              | Turkey   | Erzincan (6)      | 39.31         | 39.42        | Tissue      | A. Kence         | EF989338      |
| 177           | Ca177 | 71         | C          | <i>C. aegagrus</i>              | Turkey   | Gaziantep (7)     | 37.72         | 38.45        | Tissue      | A. Kence         | EF989339      |
| 178           | Ca178 | 72         | C          | <i>C. aegagrus</i>              | Turkey   | Van (10)          | 43.22         | 38.29        | Tissue      | A. Kence         | EF989340      |
| 179           | Ca179 | 54         | C          | <i>C. aegagrus</i>              | Turkey   | Tunceli (8)       | 39.34         | 39.07        | Tissue      | A. Kence         | EF989341      |
| 180           | Ca180 | 73         | C          | <i>C. aegagrus</i>              | Turkey   | Artvin (9)        | 41.49         | 41.11        | Tissue      | A. Kence         | EF989342      |
| 181           | Ca181 | 74         | C          | <i>C. aegagrus</i>              | Turkey   | Erzincan (6)      | 39.31         | 39.42        | Tissue      | A. Kence         | EF989343      |
| 182           | Ca182 | 75         | C          | <i>C. aegagrus</i>              | Turkey   | Erzincan (6)      | 39.31         | 39.42        | Tissue      | A. Kence         | EF989344      |
| 183           | Ca183 | 76         | C          | <i>C. aegagrus</i>              | Turkey   | Erzincan (6)      | 39.31         | 39.42        | Tissue      | A. Kence         | EF989345      |
| 184           | Ca184 | 77         | C          | <i>C. aegagrus</i>              | Turkey   | Erzincan (6)      | 39.31         | 39.42        | Tissue      | A. Kence         | EF989346      |
| 185           | Ca185 | 78         | C          | <i>C. aegagrus</i>              | Turkey   | Erzincan (6)      | 39.31         | 39.42        | Tissue      | A. Kence         | EF989347      |
| 186           | Ca186 | 79         | C          | <i>C. aegagrus</i>              | Turkey   | Erzincan (6)      | 39.31         | 39.42        | Tissue      | A. Kence         | EF989348      |
| 187           | Ca187 | 80         | C          | <i>C. aegagrus chiltanensis</i> | Pakistan | Hazarganji (41)   | 66.11         | 27.28        | Feces       | A. T. Virk       | EF989349      |
| 188           | Ca188 | 81         | C          | <i>C. aegagrus chiltanensis</i> | Pakistan | Hazarganji (41)   | 66.11         | 27.28        | Feces       | A. T. Virk       | EF989350      |
| 189           | Ca189 | 44         | C          | <i>C. aegagrus chiltanensis</i> | Pakistan | Hazarganji (41)   | 66.11         | 27.28        | Feces       | A. T. Virk       | EF989351      |
| 190           | Ca190 | 44         | C          | <i>C. aegagrus chiltanensis</i> | Pakistan | Hazarganji (41)   | 66.11         | 27.28        | Feces       | A. T. Virk       | EF989352      |
| 191           | Ca191 | 82         | C          | <i>C. aegagrus chiltanensis</i> | Pakistan | Hazarganji (41)   | 66.11         | 27.28        | Feces       | A. T. Virk       | EF989353      |

| Sample number | Code  | Haplotypes | Haplogroup | Species                         | Country  | Population      | Longitude (E) | Latitude (N) | Sample type | Collector        | Accession no. |
|---------------|-------|------------|------------|---------------------------------|----------|-----------------|---------------|--------------|-------------|------------------|---------------|
| 192           | Ca192 | 44         | C          | <i>C. aegagrus chiltanensis</i> | Pakistan | Hazarganji (41) | 66.11         | 27.28        | Feces       | A. T. Virk       | EF989354      |
| 193           | Ca193 | 44         | C          | <i>C. aegagrus chiltanensis</i> | Pakistan | Hazarganji (41) | 66.11         | 27.28        | Feces       | A. T. Virk       | EF989355      |
| 194           | Ca194 | 81         | C          | <i>C. aegagrus chiltanensis</i> | Pakistan | Hazarganji (41) | 66.11         | 27.28        | Feces       | A. T. Virk       | EF989356      |
| 195           | Ca195 | 82         | C          | <i>C. aegagrus chiltanensis</i> | Pakistan | Hazarganji (41) | 66.11         | 27.28        | Feces       | A. T. Virk       | EF989357      |
| 196           | Ca196 | 44         | C          | <i>C. aegagrus chiltanensis</i> | Pakistan | Hazarganji (41) | 66.11         | 27.28        | Feces       | A. T. Virk       | EF989358      |
| 197           | Ca197 | 81         | C          | <i>C. aegagrus</i>              | Pakistan | Hazarganji (41) | 66.11         | 27.28        | Feces       | A. T. Virk       | EF989359      |
| 198           | Ca198 | 83         | D          | <i>C. aegagrus</i>              | Iran     | Bamoo (26)      | 52.68         | 29.69        | Feces       | S. Naderi        | EF989360      |
| 199           | Ca199 | 84         | D          | <i>C. aegagrus</i>              | Iran     | Bamoo (26)      | 52.68         | 29.69        | Feces       | S. Naderi        | EF989361      |
| 200           | Ca200 | 84         | D          | <i>C. aegagrus</i>              | Iran     | Bamoo (26)      | 52.68         | 29.69        | Feces       | S. Naderi        | EF989362      |
| 201           | Ca201 | 84         | D          | <i>C. aegagrus</i>              | Iran     | Bamoo (26)      | 52.68         | 29.69        | Feces       | S. Naderi        | EF989363      |
| 202           | Ca202 | 84         | D          | <i>C. aegagrus</i>              | Iran     | Bamoo (26)      | 52.68         | 29.69        | Feces       | S. Naderi        | EF989364      |
| 203           | Ca203 | 84         | D          | <i>C. aegagrus</i>              | Iran     | Bamoo (26)      | 52.68         | 29.69        | Feces       | S. Naderi        | EF989365      |
| 204           | Ca204 | 84         | D          | <i>C. aegagrus</i>              | Iran     | Bamoo (26)      | 52.68         | 29.69        | Feces       | S. Naderi        | EF989366      |
| 205           | Ca205 | 85         | D          | <i>C. aegagrus</i>              | Iran     | Godghool (27)   | 55.14         | 29.45        | Feces       | S. Naderi        | EF989367      |
| 206           | Ca206 | 86         | D          | <i>C. aegagrus</i>              | Iran     | Dahaj (29)      | 54.87         | 30.57        | Feces       | S. Naderi        | EF989368      |
| 207           | Ca207 | 87         | D          | <i>C. aegagrus</i>              | Iran     | Kolahghazi (23) | 51.81         | 32.42        | Feces       | S. Naderi        | EF989369      |
| 208           | Ca208 | 87         | D          | <i>C. aegagrus</i>              | Iran     | Kolahghazi (23) | 51.81         | 32.42        | Feces       | S. Naderi        | EF989370      |
| 209           | Ca209 | 87         | D          | <i>C. aegagrus</i>              | Iran     | Kolahghazi (23) | 51.81         | 32.42        | Feces       | S. Naderi        | EF989371      |
| 210           | Ca210 | 87         | D          | <i>C. aegagrus</i>              | Iran     | Kolahghazi (23) | 51.81         | 32.42        | Feces       | S. Naderi        | EF989372      |
| 211           | Ca211 | 88         | D          | <i>C. aegagrus</i>              | Iran     | Dena (24)       | 51.32         | 31.06        | Feces       | S. Naderi        | EF989373      |
| 212           | Ca212 | 88         | D          | <i>C. aegagrus</i>              | Iran     | Dena (24)       | 51.32         | 31.06        | Feces       | S. Naderi        | EF989374      |
| 213           | Ca213 | 88         | D          | <i>C. aegagrus</i>              | Iran     | Dena (24)       | 51.32         | 31.06        | Feces       | S. Naderi        | EF989375      |
| 214           | Ca214 | 89         | D          | <i>C. aegagrus</i>              | Iran     | Dena (24)       | 51.32         | 31.06        | Feces       | S. Naderi        | EF989376      |
| 215           | Ca215 | 88         | D          | <i>C. aegagrus</i>              | Iran     | Dena (24)       | 51.32         | 31.06        | Feces       | S. Naderi        | EF989377      |
| 216           | Ca216 | 88         | D          | <i>C. aegagrus</i>              | Iran     | Dena (24)       | 51.32         | 31.06        | Feces       | S. Naderi        | EF989378      |
| 217           | Ca217 | 88         | D          | <i>C. aegagrus</i>              | Iran     | Dena (24)       | 51.32         | 31.06        | Feces       | S. Naderi        | EF989379      |
| 218           | Ca218 | 88         | D          | <i>C. aegagrus</i>              | Iran     | Dena (24)       | 51.32         | 31.06        | Feces       | S. Naderi        | EF989380      |
| 219           | Ca219 | 90         | D          | <i>C. aegagrus</i>              | Iran     | Dena (24)       | 51.32         | 31.06        | Feces       | S. Naderi        | EF989381      |
| 220           | Ca220 | 88         | D          | <i>C. aegagrus</i>              | Iran     | Dena (24)       | 51.32         | 31.06        | Feces       | S. Naderi        | EF989382      |
| 221           | Ca221 | 88         | D          | <i>C. aegagrus</i>              | Iran     | Dena (24)       | 51.32         | 31.06        | Feces       | S. Naderi        | EF989383      |
| 222           | Ca222 | 88         | D          | <i>C. aegagrus</i>              | Iran     | Dena (24)       | 51.32         | 31.06        | Feces       | S. Naderi        | EF989384      |
| 223           | Ca223 | 88         | D          | <i>C. aegagrus</i>              | Iran     | Dena (24)       | 51.32         | 31.06        | Feces       | S. Naderi        | EF989385      |
| 224           | Ca224 | 88         | D          | <i>C. aegagrus</i>              | Iran     | Dena (24)       | 51.32         | 31.06        | Feces       | S. Naderi        | EF989386      |
| 225           | Ca225 | 88         | D          | <i>C. aegagrus</i>              | Iran     | Dena (24)       | 51.32         | 31.06        | Feces       | S. Naderi        | EF989387      |
| 226           | Ca226 | 91         | D          | <i>C. aegagrus</i>              | Iran     | Dena (24)       | 51.32         | 31.06        | Feces       | S. Naderi        | EF989388      |
| 227           | Ca227 | 88         | D          | <i>C. aegagrus</i>              | Iran     | Dena (24)       | 51.32         | 31.06        | Feces       | S. Naderi        | EF989389      |
| 228           | Ca228 | 88         | D          | <i>C. aegagrus</i>              | Iran     | Kalmand (28)    | 54.79         | 31.28        | Feces       | S. Naderi        | EF989390      |
| 229           | Ca229 | 97         | G          | <i>C. aegagrus</i>              | Iran     | Marakan (12)    | 45.24         | 38.85        | Feces       | H.-R. HR. Rezaei | EF989391      |
| 230           | Ca230 | 92         | G          | <i>C. aegagrus</i>              | Iran     | Zalzard (13)    | 45.63         | 34.06        | Feces       | H.-R. HR. Rezaei | EF989392      |
| 231           | Ca231 | 93         | G          | <i>C. aegagrus</i>              | Iran     | Zalzard (13)    | 45.63         | 34.06        | Feces       | H.-R. HR. Rezaei | EF989393      |
| 232           | Ca232 | 94         | G          | <i>C. aegagrus</i>              | Iran     | Zalzard (13)    | 45.63         | 34.06        | Feces       | H.-R. HR. Rezaei | EF989394      |
| 233           | Ca233 | 92         | G          | <i>C. aegagrus</i>              | Iran     | Zalzard (13)    | 45.63         | 34.06        | Feces       | H.-R. HR. Rezaei | EF989395      |
| 234           | Ca234 | 95         | G          | <i>C. aegagrus</i>              | Iran     | Zalzard (13)    | 45.63         | 34.06        | Feces       | H.-R. HR. Rezaei | EF989396      |
| 235           | Ca235 | 96         | G          | <i>C. aegagrus</i>              | Iran     | Godghool (27)   | 55.14         | 29.45        | Feces       | S. Naderi        | EF989397      |
| 236           | Ca236 | 97         | G          | <i>C. aegagrus</i>              | Iran     | Dahaj (29)      | 54.87         | 30.57        | Feces       | S. Naderi        | EF989398      |
| 237           | Ca237 | 97         | G          | <i>C. aegagrus</i>              | Iran     | Dahaj (29)      | 54.87         | 30.57        | Feces       | S. Naderi        | EF989399      |
| 238           | Ca238 | 98         | G          | <i>C. aegagrus</i>              | Iran     | Dena (24)       | 51.32         | 31.06        | Feces       | S. Naderi        | EF989400      |
| 239           | Ca239 | 88         | C          | <i>C. aegagrus</i>              | Iran     | Dena (24)       | 51.32         | 31.06        | Feces       | S. Naderi        | EF989401      |
| 240           | Ca240 | 99         | C          | <i>C. aegagrus</i>              | Iran     | Bamoo (26)      | 52.68         | 29.69        | Feces       | S. Naderi        | EF989402      |
| 241           | Ca241 | 100        | C          | <i>C. aegagrus</i>              | Iran     | Kalmand (28)    | 54.79         | 31.28        | Feces       | S. Naderi        | EF989403      |
| 242           | Ca242 | 101        | C          | <i>C. aegagrus</i>              | Iran     | Kalmand (28)    | 54.79         | 31.28        | Feces       | S. Naderi        | EF989404      |
| 243           | Ca243 | 102        | C          | <i>C. aegagrus</i>              | Iran     | Dahaj (29)      | 54.87         | 30.57        | Feces       | S. Naderi        | EF989405      |
| 244           | Ca244 | 48         | C          | <i>C. aegagrus</i>              | Iran     | Godghool (27)   | 55.14         | 29.45        | Feces       | S. Naderi        | EF989406      |
| 245           | Ca245 | 103        | C          | <i>C. aegagrus</i>              | Iran     | Kavir (22)      | 52.19         | 34.71        | Feces       | S. Naderi        | EF989407      |
| 246           | Ca246 | 104        | C          | <i>C. aegagrus</i>              | Iran     | Shoorab (32)    | 61.46         | 30.13        | Feces       | S. Naderi        | EF989408      |
| 247           | Ca247 | 105        | C          | <i>C. aegagrus</i>              | Iran     | Kolahghazi (23) | 51.81         | 32.42        | Feces       | S. Naderi        | EF989409      |
| 248           | Ca248 | 106        | C          | <i>C. aegagrus</i>              | Iran     | Kolahghazi (23) | 51.81         | 32.42        | Feces       | S. Naderi        | EF989410      |
| 249           | Ca249 | 106        | C          | <i>C. aegagrus</i>              | Iran     | Kolahghazi (23) | 51.81         | 32.42        | Feces       | S. Naderi        | EF989411      |
| 250           | Ca250 | 106        | C          | <i>C. aegagrus</i>              | Iran     | Dahaj (29)      | 54.87         | 30.57        | Feces       | S. Naderi        | EF989412      |
| 251           | Ca251 | 107        | C          | <i>C. aegagrus</i>              | Iran     | Kalmand (28)    | 54.79         | 31.28        | Tissue      | S. Naderi        | EF989413      |
| 252           | Ca252 | 108        | C          | <i>C. aegagrus</i>              | Iran     | Khabr (31)      | 56.48         | 28.84        | Feces       | S. Naderi        | EF989414      |
| 253           | Ca253 | 109        | C          | <i>C. aegagrus</i>              | Iran     | Khabr (31)      | 56.48         | 28.84        | Feces       | S. Naderi        | EF989415      |
| 254           | Ca254 | 109        | C          | <i>C. aegagrus</i>              | Iran     | Khabr (31)      | 56.48         | 28.84        | Feces       | S. Naderi        | EF989416      |
| 255           | Ca255 | 110        | C          | <i>C. aegagrus</i>              | Iran     | Godghool (27)   | 55.14         | 29.45        | Feces       | S. Naderi        | EF989417      |











**Table S2. Additional information about the archeological sites indicated in Fig. 3A**

| Site            | Region                            | Country  | Culture            | Date cal. B.P. | Origin of early domestic goats | References |
|-----------------|-----------------------------------|----------|--------------------|----------------|--------------------------------|------------|
| Nevalı Çori     | Eastern Anatolia                  | Turkey   | Early PPNB         | ca. 10,500     | local                          | 6          |
| Shillourokambos | Cyprus                            | Cyprus   | Early/Middle PPNB  | 10,300–10,200  | transferred                    | 7,8        |
| Aswad           | Damascus plain                    | Syria    | Early/Middle PPNB  | 10,300–10,000  | transferred                    | 9          |
| Çayönü          | Eastern Anatolia                  | Turkey   | Middle PPNB        | ca. 10,000     | ?                              | 10         |
| Aşıklı          | Central Anatolia                  | Turkey   | Middle PPNB        | 10,000–9500    | ?                              | 11         |
| Nemrik          | Eastern Anatolia                  | Iraq     | Middle PPNB        | 10,000–9500    | ?                              | 12         |
| Ganj Dareh      | Central Zagros                    | Iran     | Aceramic Neolithic | 9900–9700      | local                          | 13–15      |
| Halula          | Euphrates Valley                  | Syria    | Middle PPNB        | 9800–9500      | transferred                    | 16         |
| Abu Hureyra     | Euphrates Valley                  | Syria    | Middle PPNB        | 9800–9500      | transferred                    | 17, 18     |
| Tapeh Guran     | Central Zagros                    | Iran     | Aceramic Neolithic | 9500–9200      | ?                              | 13–15      |
| Ali Kosh        | Central Zagros lowlands           | Iran     | Aceramic Neolithic | 9500–9400      | transferred                    | 13–15      |
| Tal-i-Mushki    | Fars                              | Iran     | Aceramic Neolithic | 8000–8500      | ?                              | 19         |
| Mehrgarh        | Eastern Balotchistan/Indus Valley | Pakistan | Aceramic Neolithic | ?9000–7500     | transferred                    | 20–22      |

PPNB: PrePottery Neolithic B.
